# Supplementary material for: An adapted protocol to derive microglia from stem cells and its application in the study of CSF1R-related disorders
Source: PubMed Central journal article supplement (PMC10996091; doi:10.1186/s13024-024-00723-x), 2024-04-05

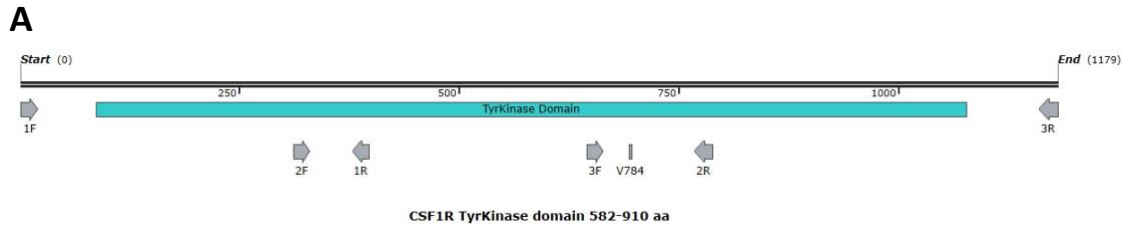

**B**

| Primer name        | Sequence (5'-3')     |
|--------------------|----------------------|
| CSF1R-TyrKinase-1F | TCGAGAGCTATGAGGGCAAC |
| CSF1R-TyrKinase-1R | GTCCCAGCATGGCCTCAG   |
| CSF1R-TyrKinase-2F | AGGCCCTGACTGGTCATCA  |
| CSF1R-TyrKinase-2R | GCATTGCCCTTGACAATGTA |
| CSF1R-TyrKinase-3F | TTCCTCGCTTCCAAGAATTG |
| CSF1R-TyrKinase-3R | TCTCCTCCTCCAGTCACTG  |

**Figure S1. Sequencing strategy of the region encoding CSF1R tyrosine kinase domain.**

(A) Locations where the primers would anneal. (B) Sequences of primers.

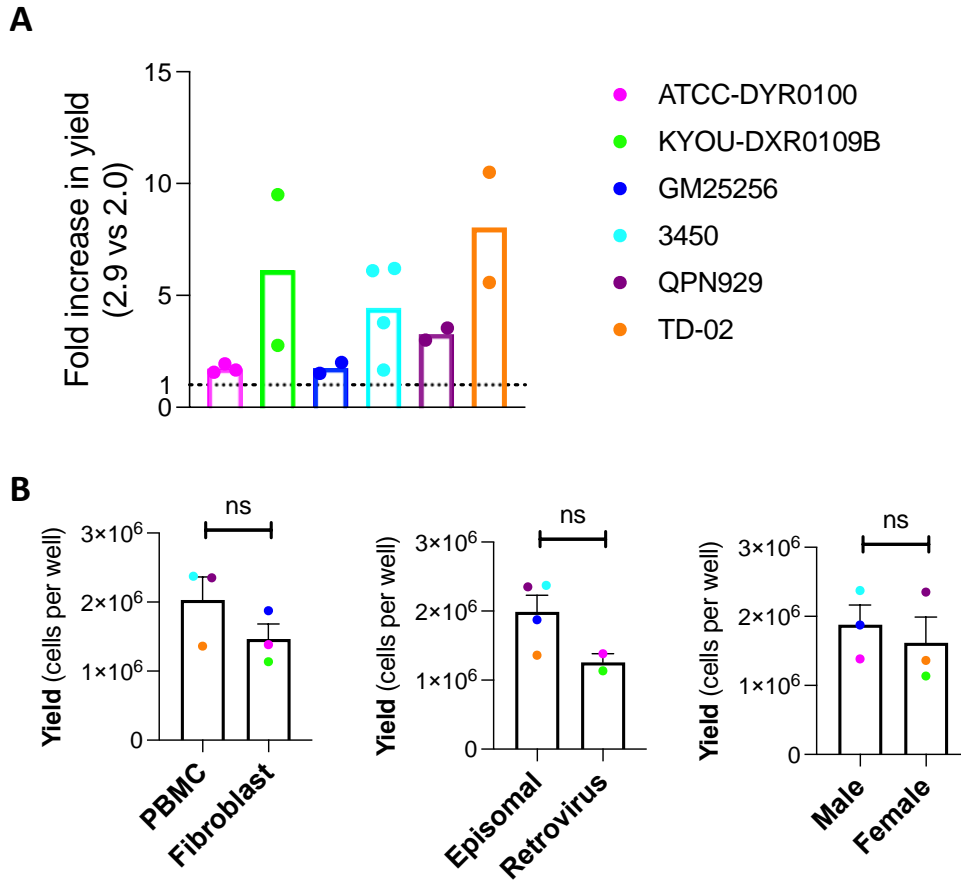

**Figure S2. Cell yield of protocols 2.0 and 2.9.** iMGL 2.0 and 2.9 were generated side-by-side from six iPSC lines. (A-B) Viable cell yield assessed by Trypan blue exclusion assay. 2-4 batches of differentiation were made per iPSC line. Average of those batches are presented in (B). T-tests were performed in (B), ns = non-significant.

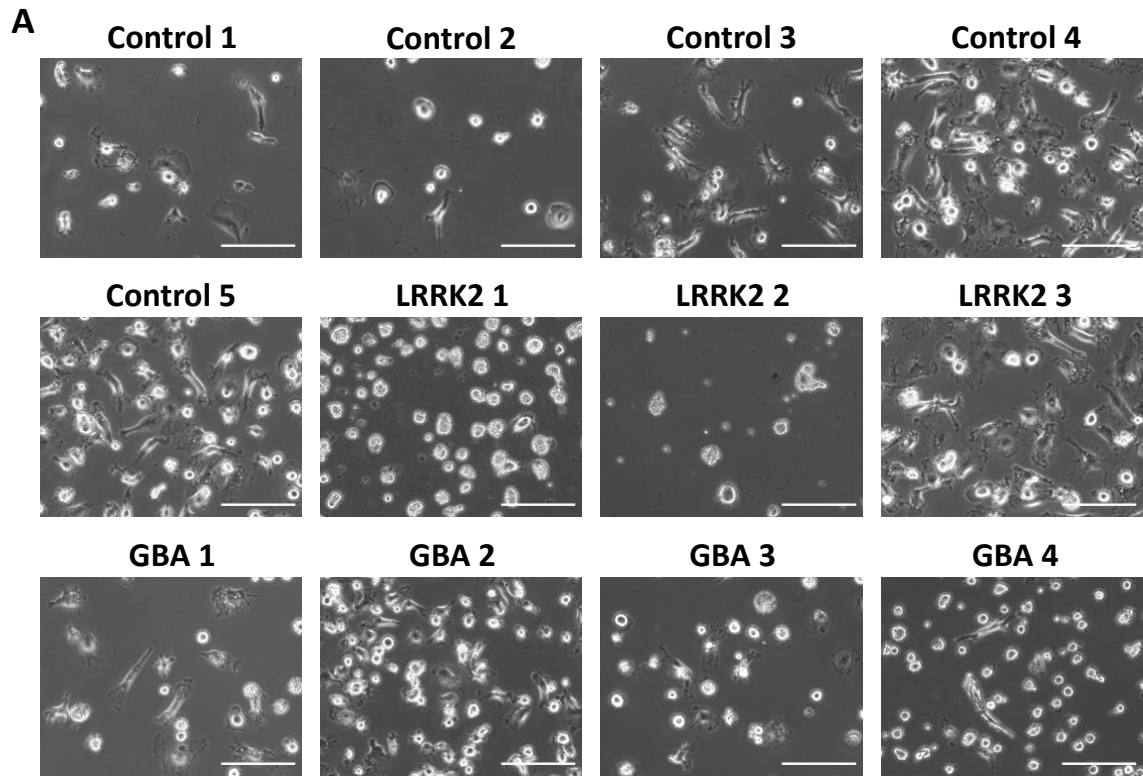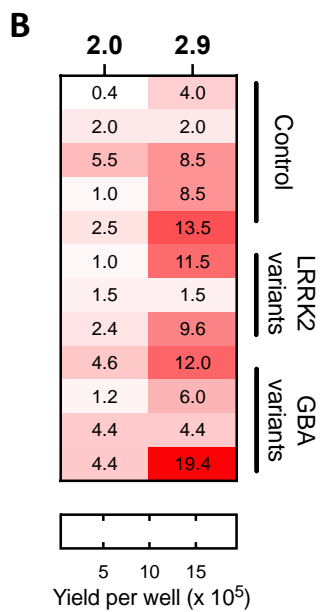

**Figure S3. Differentiation of Parkinson's disease patient-derived iPSCs into iMGL 2.9.** (A) Phase contrast images of mature iMGL. Scale bar = 150  $\mu$ m. (B) Viable cell yield per well of a 6-well plate assessed by Trypan blue exclusion assay. n = 1 per cell line.

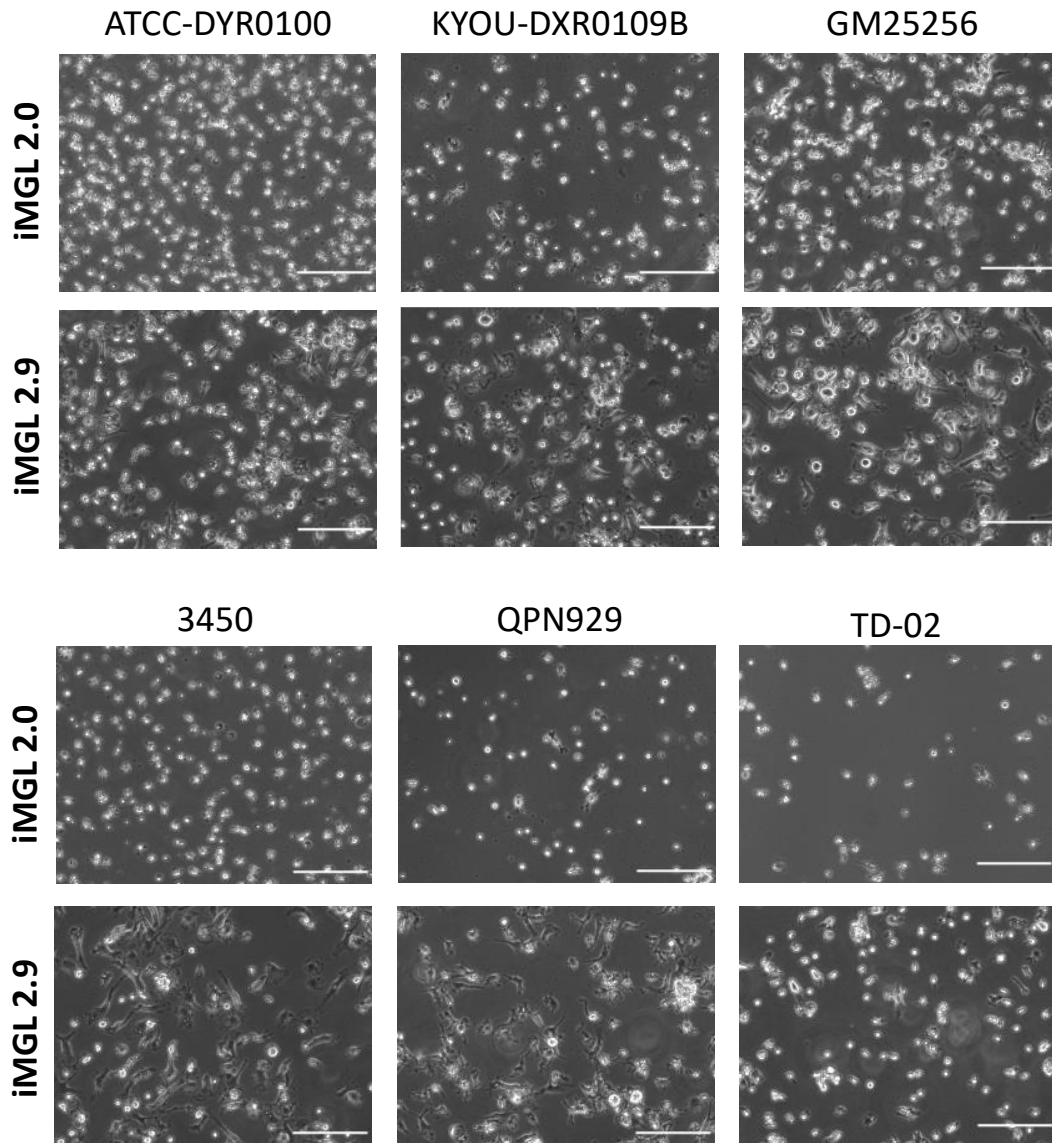

**Figure S4. Morphology of iMGL 2.0 and 2.9.** iMGL 2.0 and 2.9 were generated side-by-side from six iPSC lines. (A) Viable cell yield assessed by Trypan blue exclusion assay.  $n = 2-3$  per iPSC line. (B) Phase contrast images. Scale bar =  $150 \mu m$ .

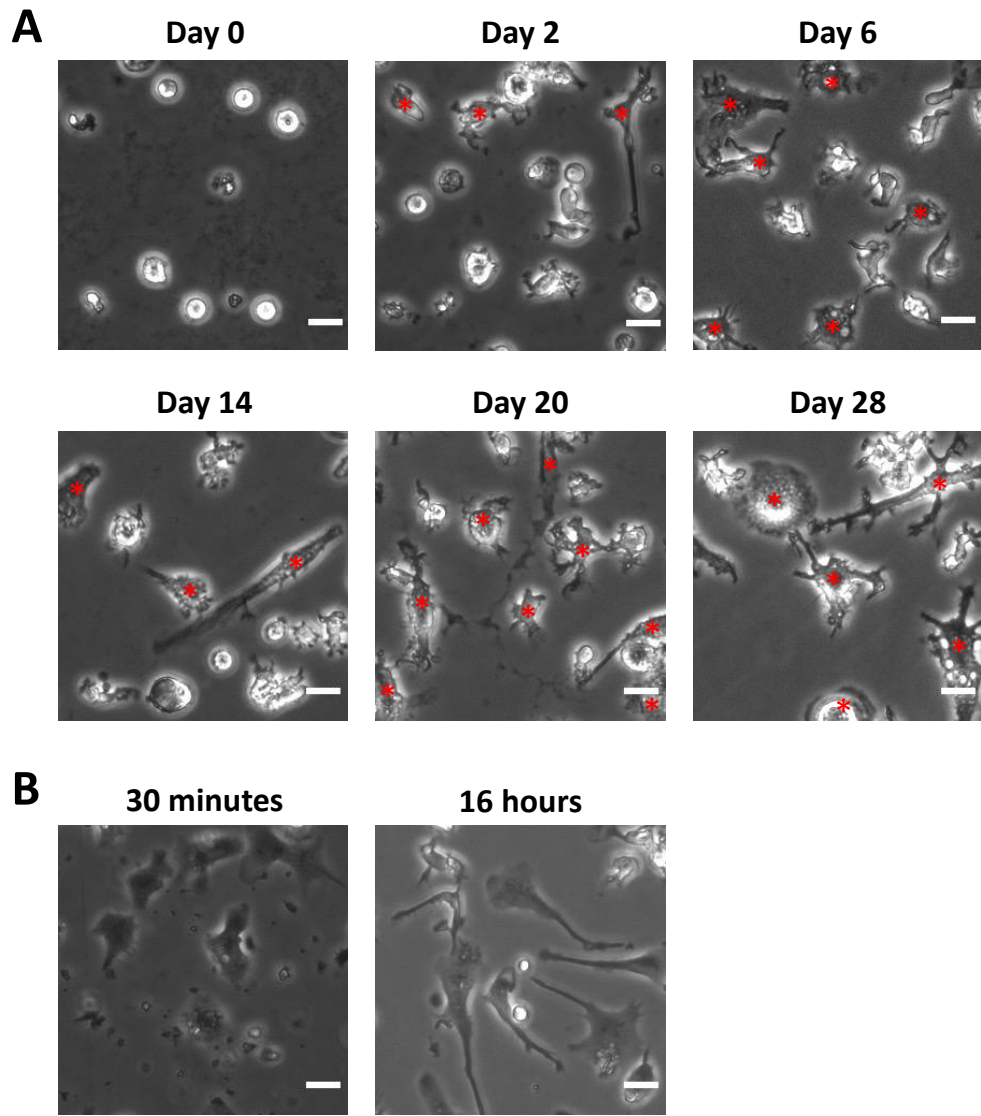

**Figure S5. Adhesive property of iMGL 2.9.** (A) Phase contrast images of iMGL 2.9 throughout microglial differentiation. Adherent cells are marked by red asterisks. Scale bar = 20  $\mu\text{m}$ . (B) Phase contrast images of mature iMGL 2.9 following replating. Scale bar = 20  $\mu\text{m}$ .

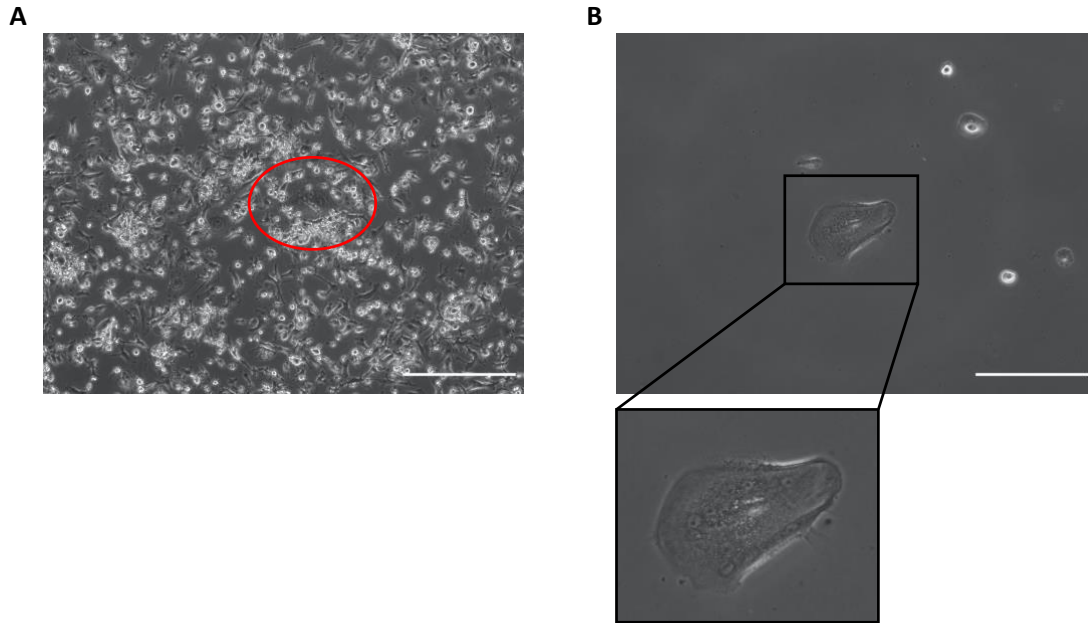

**Figure S6. Multinucleated giant cell contaminants.** Phase contrast pictures of iMGL 2.9 culture before (A) and after (B) EDTA-mediated cell harvest. Red circle in (A) depicts a multinucleated giant cell underneath mononuclear iMGL. Black square in (B) shows a zoomed-in image of a multinucleated giant cell. Scale bar = 300  $\mu\text{m}$ .

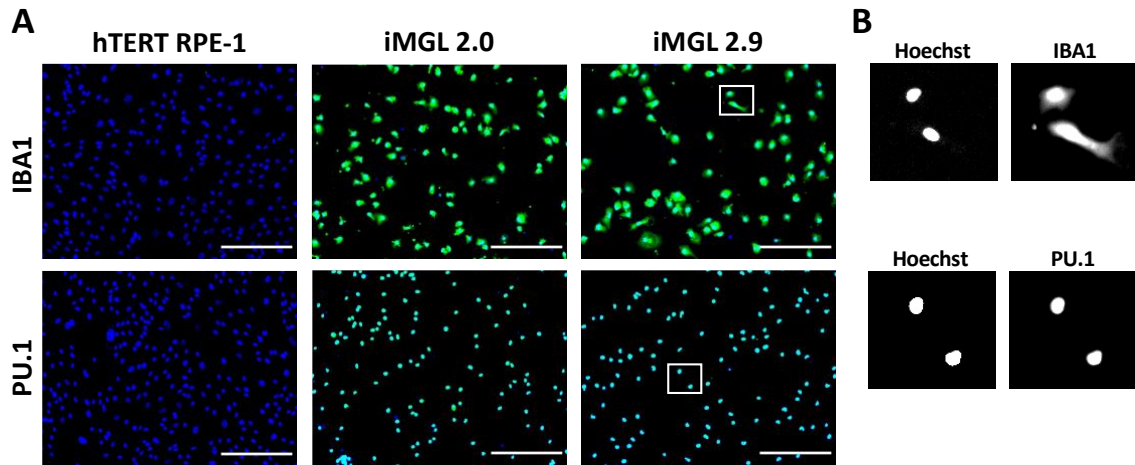

**Figure S7. IBA1 and PU.1 immunostaining.** iMGL 2.0 and 2.9 were generated side-by-side from the same iPSC line. (A) Representative images. Blue = Hoechst 33342, green = IBA1 or PU.1, scale bar = 200  $\mu$ m. (B) Zoomed, unmerged images of inserts in (A).

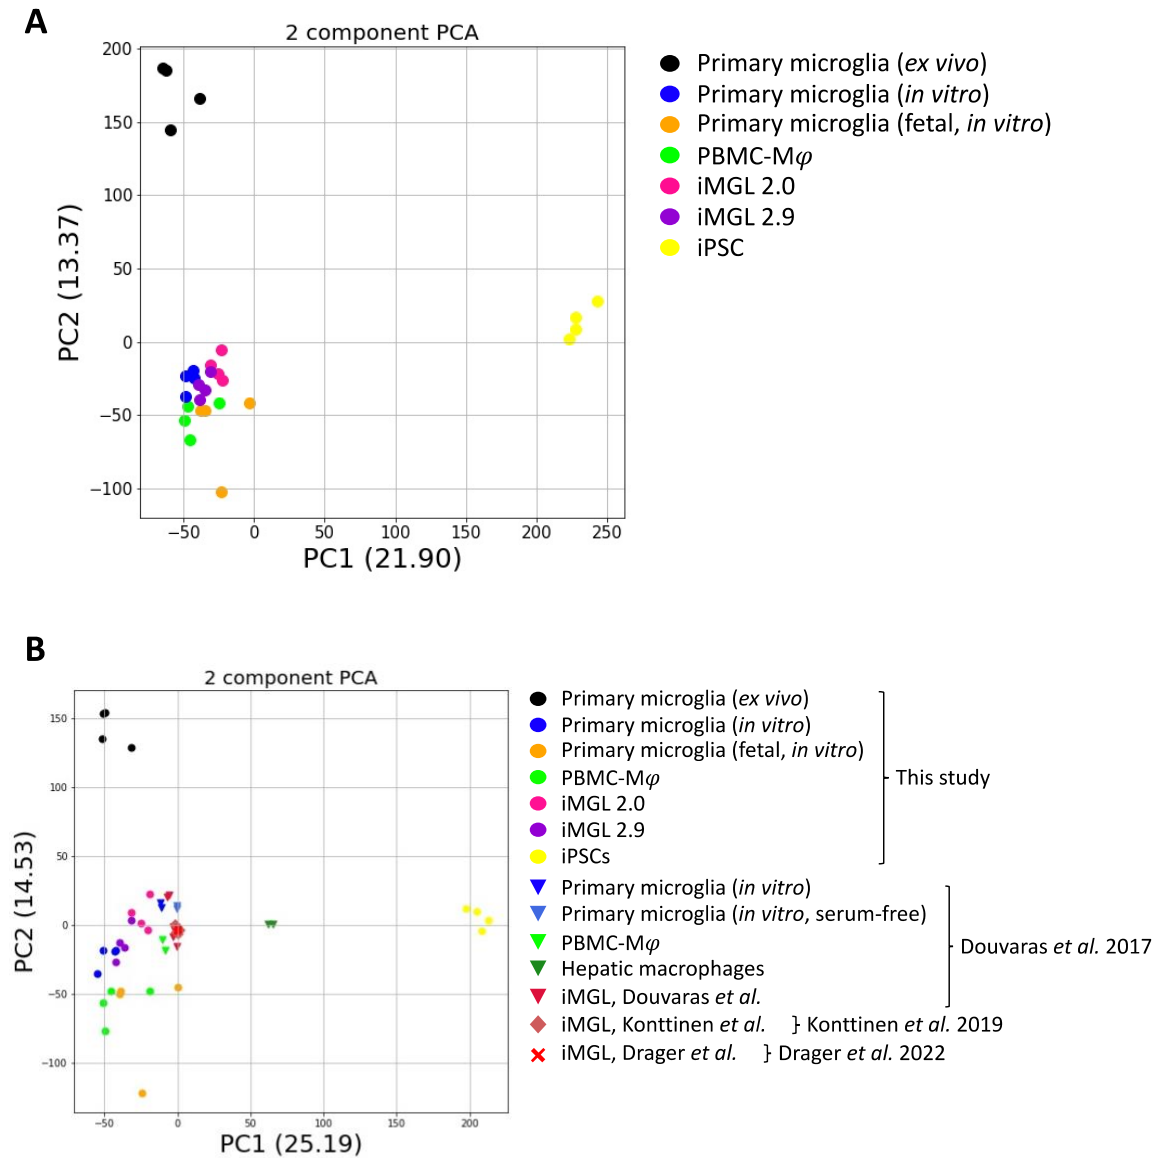

**Figure S8. Transcriptome of iMGL 2.0 and 2.9 compared to primary microglia and iPSCs.** (A-B) PCA plots of RNA-sequencing data are presented. iMGL 2.0 and 2.9 were differentiated side-by-side from the same four iPSC lines.



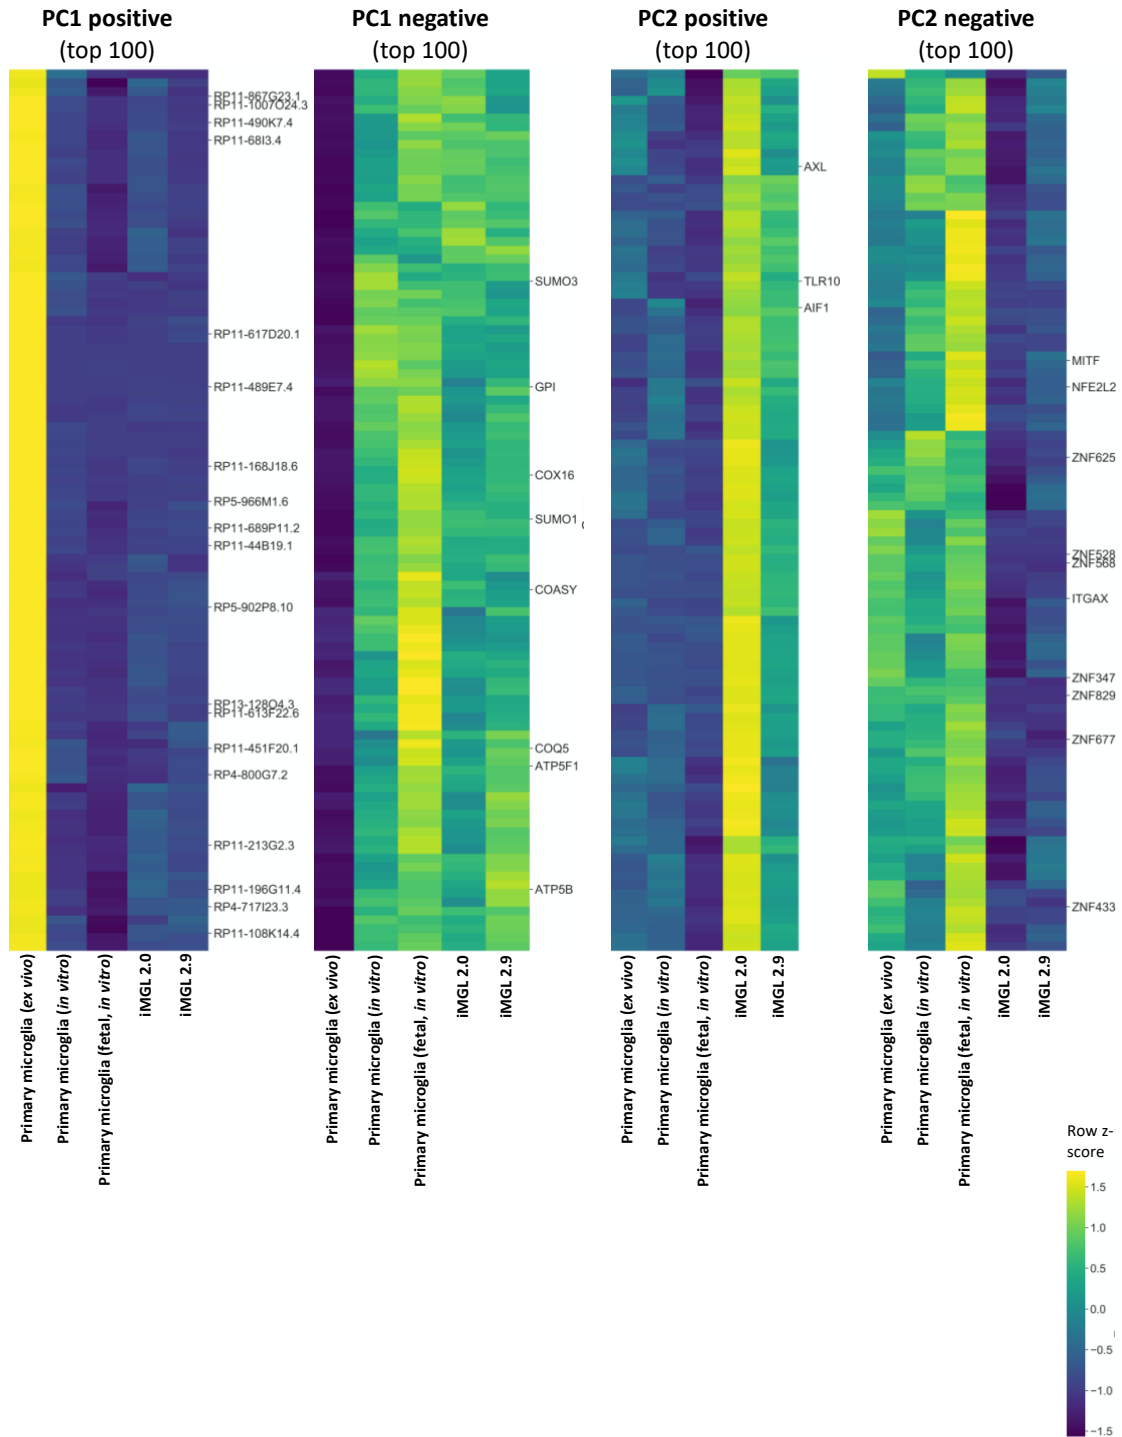

**Figure S9. Top genes driving PC1 and PC2 variances.** iMGL 2.0 and 2.9 were generated side-by-side from the same iPSC lines. n = 4 donors for primary cells, 4 lines for iMGL.

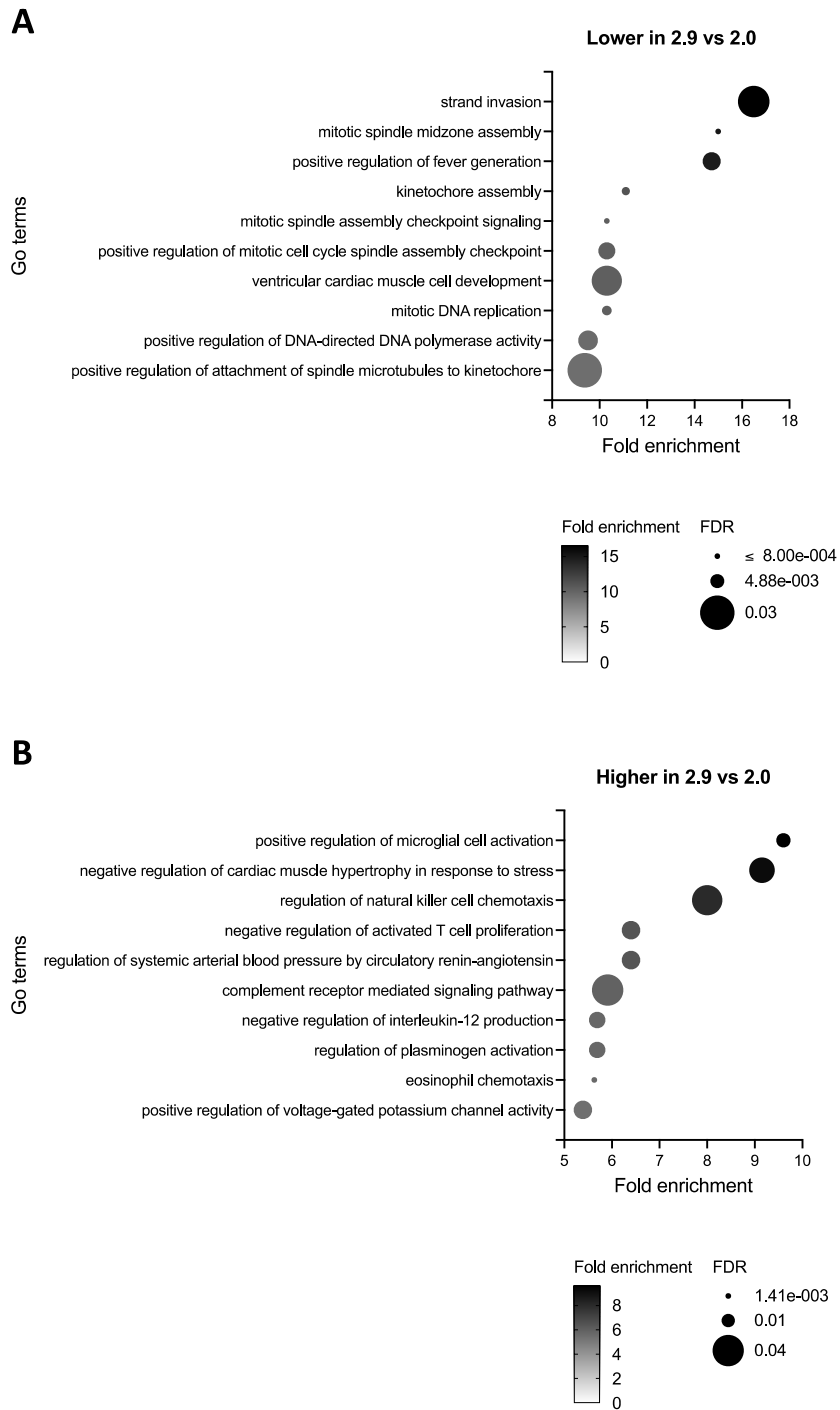

**Figure S10. GO term analysis of DEGs identified between iMGL 2.9 and 2.0.** iMGL 2.0 and 2.9 were generated side-by-side from the same four iPSC lines. FDR = false discovery rate.

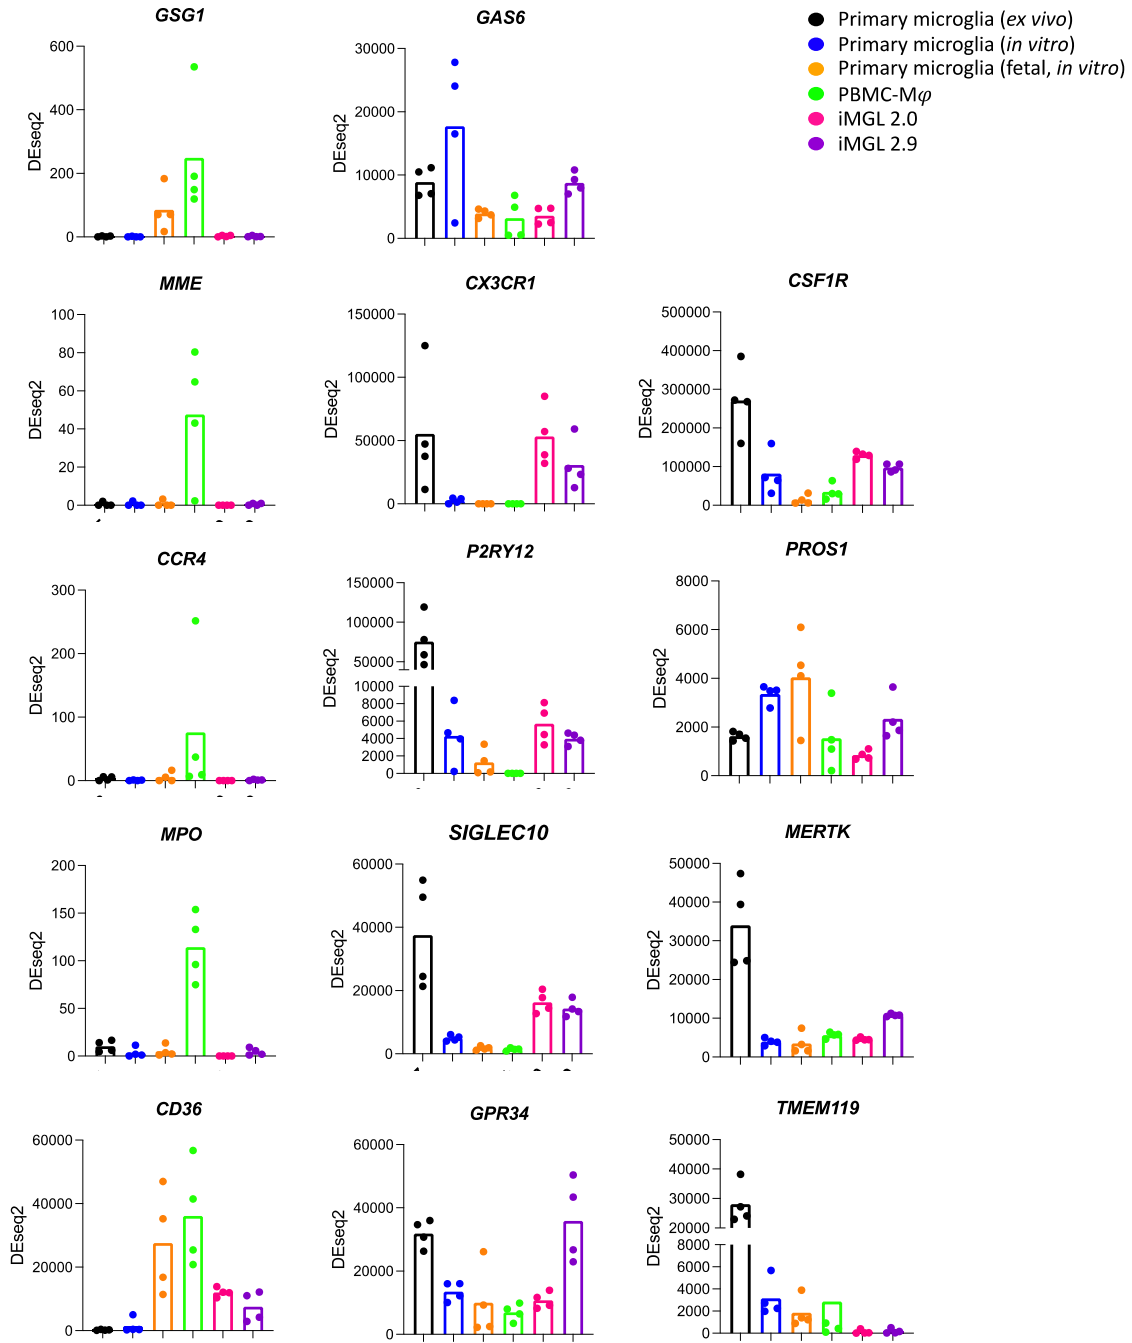

**Figure S11. RNAseq analysis of iMGL 2.9 transcriptome.** iMGL 2.0 and 2.9 were generated side-by-side from the same iPSC lines. Expression of select macrophage and microglia markers are presented. n = 4 donors for primary cells, 4 lines for iMGL.

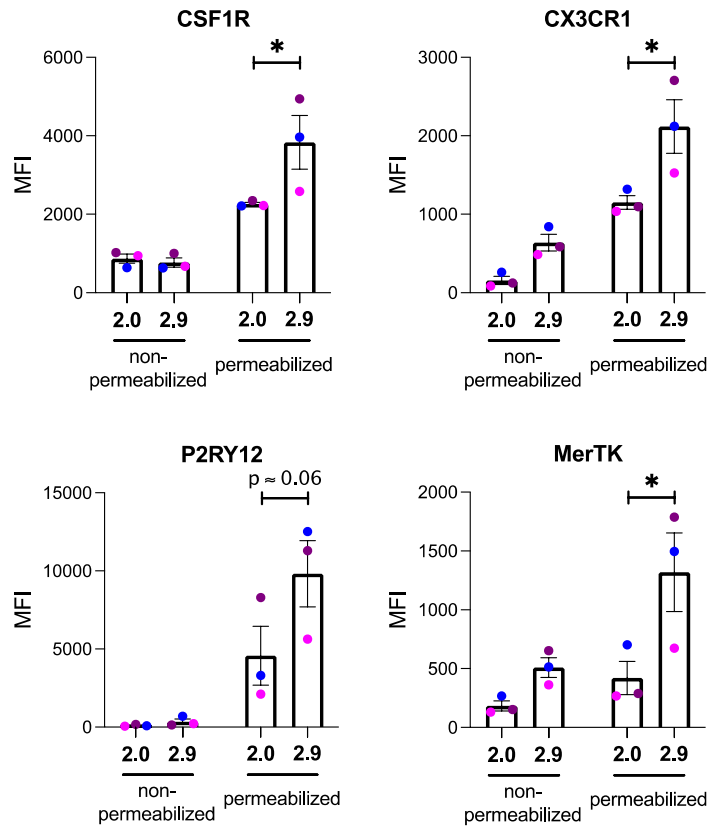

**Figure S12. Flow cytometry assessment of microglia markers in iMGL 2.0 and 2.9.**

iMGL 2.0 and 2.9 were generated side-by-side from the same iPSC lines. Two-way ANOVA were performed, followed by Sidak's post hoc test.  $n = 3$  lines, \*  $p < 0.05$ . MFI = median fluorescence intensity.

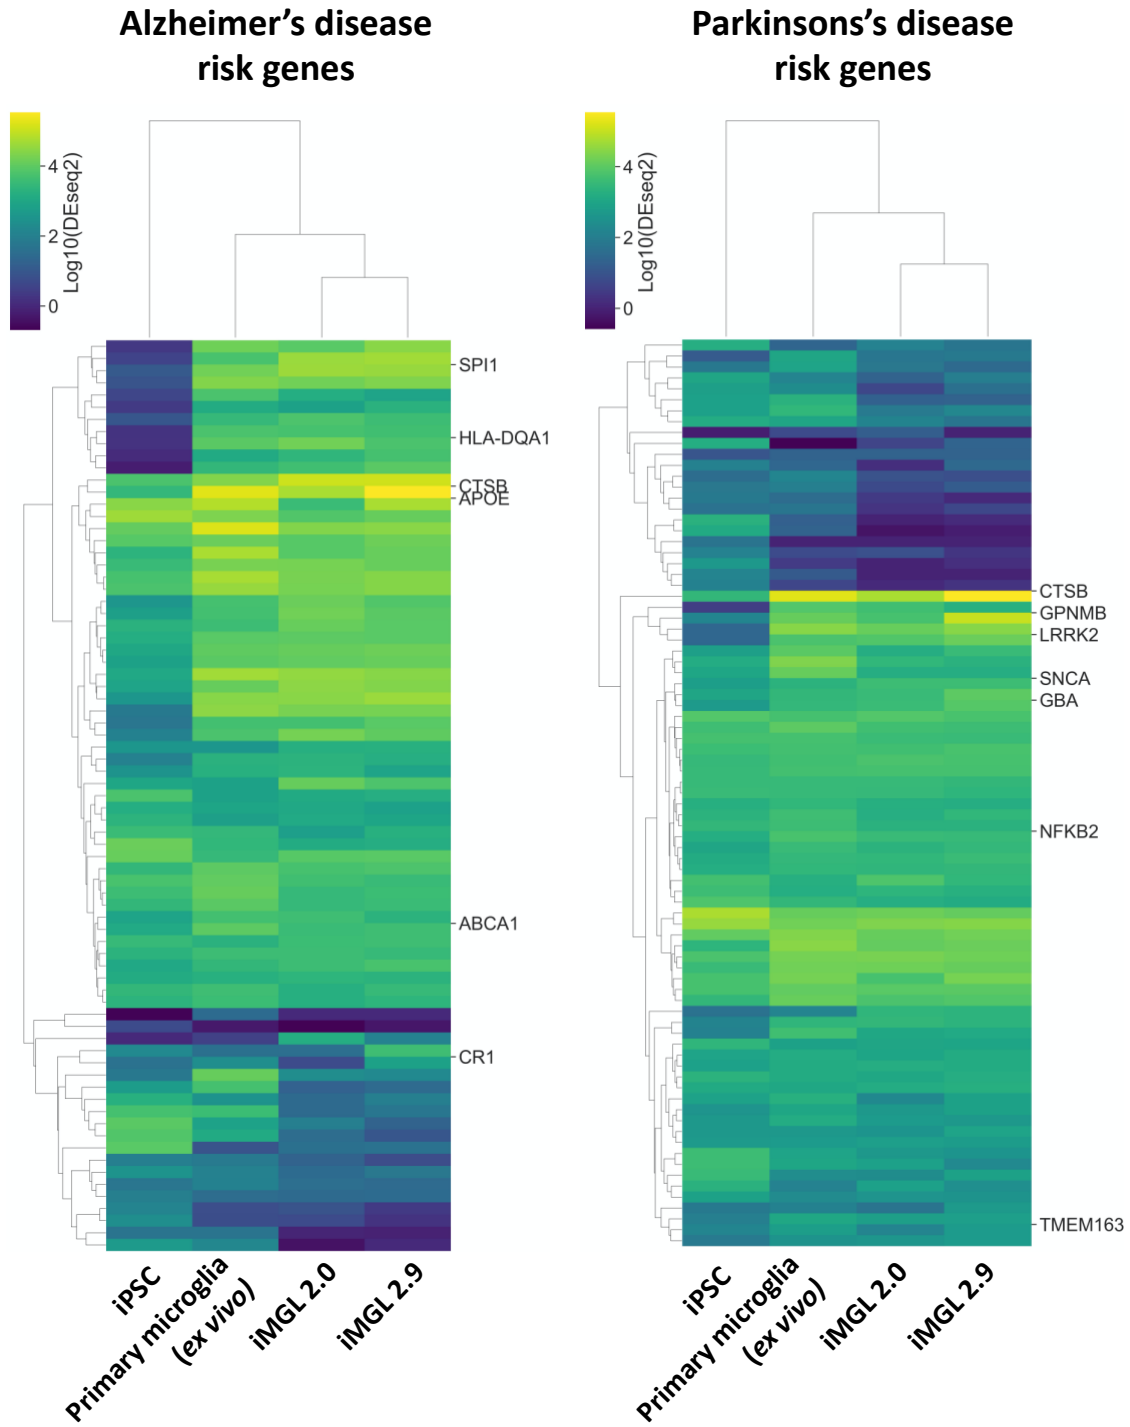

**Figure S13. Expression of disease-associated risk genes in iMGL 2.0 and 2.9.** iMGL 2.0 and 2.9 were generated side-by-side from the same iPSC lines. n = 4 donors for primary microglia, 4 lines for iMGL and iPSCs.

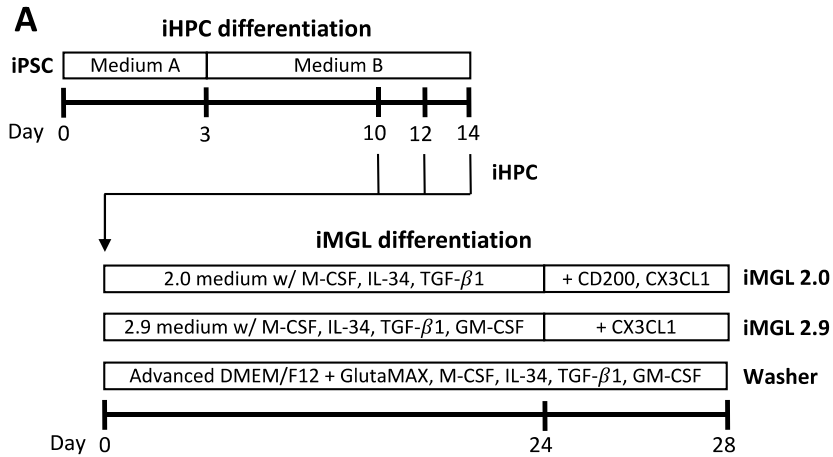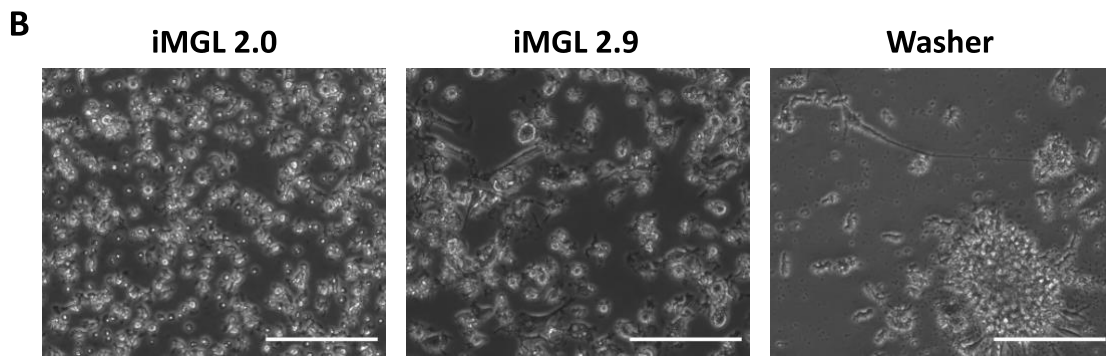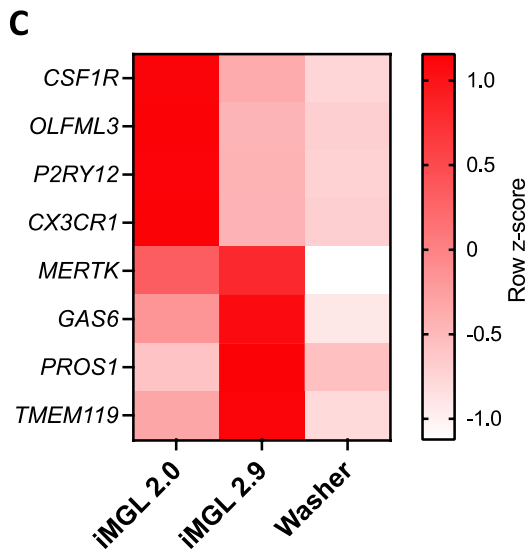

**Figure S14. iMGL derived using Washer *et al.*'s microglial differentiation medium.**

(A) Schematic of the experimental design. iHPCs were subjected to microglial differentiation using the 2.0, the 2.9 or Washer *et al.*'s differentiation media, side-by-side

from the same iPSC lines. Scale bar = 150  $\mu m$ . (B) Phase contrast images taken at day 28.  
(C) qRT-PCR assessment of microglia marker genes. n = 2 lines.

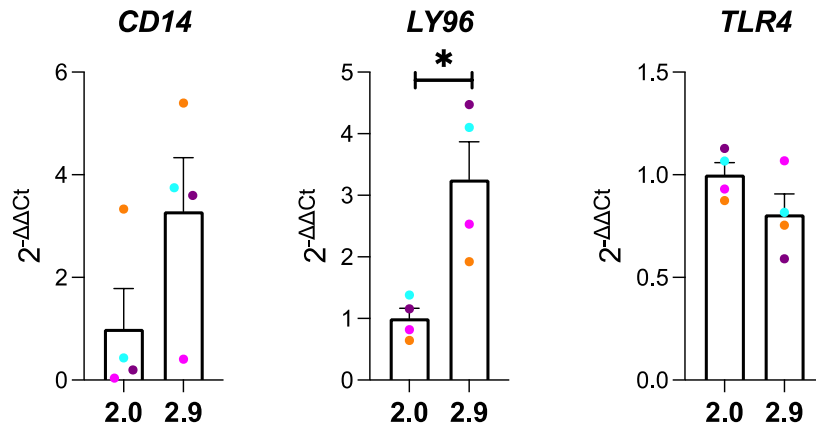

**Figure S15. qRT-PCR assessment of *CD14*, *LY96* and *TLR4* expression in iMGL 2.0 and 2.9.** iMGL 2.0 and 2.9 were differentiated side-by-side from the same iPSC lines. T-tests were performed. n = 4 lines, \* p < 0.05.



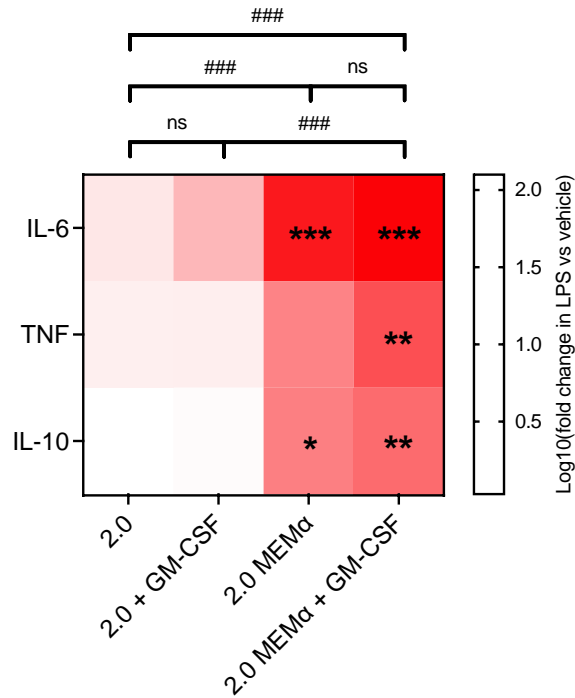

**Figure S16. Media-dependent inflammatory response of iMGL to LPS.** iMGL were differentiated using the indicated media formulation and then treated with vehicle or LPS (100 ng/mL) for 24 hours. Cytokine secretion in cell supernatants was assessed. A two-way ANOVA was performed, followed by Dunnett's post hoc test (asterisks) and Tukey's post hoc test (hash signs). n = 3 lines, \* p < 0.05, \*\* p < 0.01, \*\*\* p < 0.001 vs iMGL 2.0, ns = non-significant, ### p < 0.001.

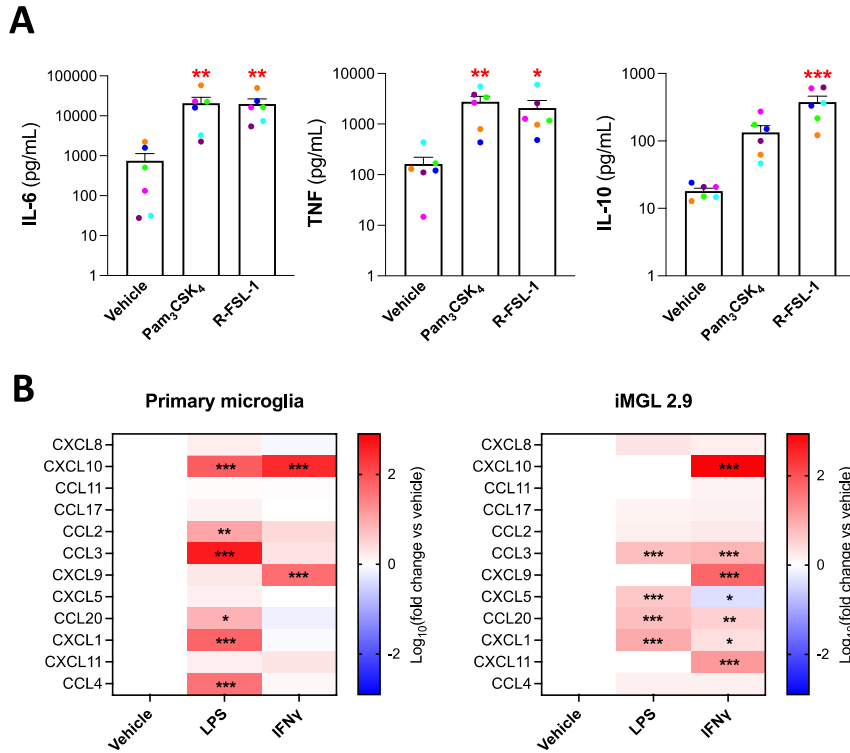

Supplement: 13024_2024_723_MOESM1_ESM.pdf [file 13024_2024_723_MOESM1_ESM.pdf]
